# Supplementary material
Source: Research Square preprint supplement (doi:10.21203/rs.3.rs-10084577/v1)
Supplement: Supplementary file 1 [file 92d4a6592606ba89e29db3ca.docx]

**Supplementary Table 1.** Cell-specific gene signature

| Gene | Origin |
| --- | --- |
| POU5F1 | Stem/ progenitor cells |
| SOX9 |
| CD44 |
| CD24 |
| PAX2 |
| PAX8 |
| CITED1 |
| NOTCH2 |
| SIX2 |
| LGR5 |
| PROM1 |
| PODXL | Podocytes |
| WT1 |
| CD2AP |
| NPHS1 |
| ABCC1 | Proximal tubule |
| ABCC3 |
| ABCC4 |
| ATP11A |
| CLCN5 |
| LRP2 |
| SLC22A6 |
| SLC22A8 |
| SLC22A2 |
| SLC5A2 |
| SLC22A3 |
| SLC40A1 |
| UMOD | Loop of Henle |
| CLDN10 |
| CLDN14 |
| SLC12A1 |
| PCBD1 | Distal tubule cells |
| CALB1 |
| ATP1A1 |
| SLC12A3 |
| SLC41A3 |
| CDH1 | Collecting duct |
| AQP3 |
| AQP2 |
| GATA3 |
| SLC12A2 |
| PECAM1 | Endothelium |
| CDH5 |
| FLT1 |
| EPCAM | Epithelium |
| PAX8 |

**Supplementary Table 2.** Primer sequences commercially available (IDT) for all genes analyzed by qPCR.

| **Gene** | **Reference sequence** | **Assay ID (IDT)** |
| --- | --- | --- |
| RPLP0 | NM_001002 | Hs.PT.39a.22214824 |
| PRKAA1 (AMPKa1) | NM_206907 | Hs.PT.58.700639 |
| AMPKa2 | NM_006252 | Hs.PT.58.3219579 |
| GAPDH | NM_002046 | Hs.PT.39a.22214836 |
| mTOR | NM_004958 | Hs.PT.58.45414861 |
| SLC22A6 (OAT1) | NM_153278 | Hs.PT.58.447346 |
| OAT3 | NM_004254 | Hs.PT.58.40750585 |
| SLC22A1 (OCT1) | NM_153187 | Hs.PT.58.4286019 |
| OCT2 | NM_003058 | Hs.PT.58.2629312 |
| SLC5A2 (SGLT2) | NM_003041 | Hs.PT.58.38756530 |
| AQP1 | NM_001185060 | Hs.PT.56a.27098577.g |
| ACTA2 (α-SMA) | NM_001141945 | Hs.PT.56a.2542642 |
| B2M | NM_004048 | Hs.PT.58v.18759587 |
| FANK 1 (Fibronectin) | NM_145235 | Hs.PT.58.27951369 |
| HIF1A | NM_181054 | Hs.PT.58.534274 |
| EPAS1 (HIF2A) | NM_001430 | Hs.PT.58.2273374 |
| HO1 | NM_002133 | Hs.PT.58.45340055 |
| PROM1 | NM_001145847 | Hs.PT.58.28257943 |
| VMAC (Vimentin) | NM_001017921 | Hs.PT.58.3448582 |
| ACTb | NM_001101 | Hs.PT.39a.22214847 |
| KIM1 | NM_012206 | Hs.PT.58.3472 |
| NCC | NM_000339 | Hs.PT.58.40684907 |
| NGAL | NM_005564 | Hs.PT.58.27617685 |
| NKCC1 | NM_001046 | Hs.PT.58.25217590 |
| NKCC2 | NM_000338 | Hs.PT.58.41074963 |
| PAX8 | NM_003466 | Hs.PT.58.1610472 |
| SOX9 | NM_000346 | Hs.PT.58.38984663 |

**Supplementary Table 3*.***Cohort characteristics description

| **Sample ID** | **Age** | **Sex** | **Anatomophatological diagnosis** | **Histological grade** | **Tumoral paired PDOs** | **Fresh/Frozen** |
| --- | --- | --- | --- | --- | --- | --- |
| TU22002 | 76 | Male | Oncocytoma | - | Yes | Fresh |
| TU22012 | 75 | Female | Clear cell renal cell carcinoma (ccRCC) | G4 | Yes | Fresh/Frozen |
| TU22032 | 46 | Male | Xp11 translocation-associated renal cell carcinoma | G3 | No | Fresh |
| TU22043 | 62 | Male | Chromophobe renal cell carcinoma (chRCC) | G3 | Yes | Fresh |
| TU22051 | 56 | Male | Clear cell renal cell carcinoma (ccRCC) | G3 | Yes | Fresh |
| TU23001 | 50 | Male | Clear cell renal cell carcinoma (ccRCC) | G1 | Yes | Frozen |
| TU23002 | 47 | Female | Xp11 translocation-associated renal cell carcinoma | G4 | Yes | Fresh |
| TU23004 | 59 | Male | Clear cell renal cell carcinoma (ccRCC) | G3 | Yes | Frozen |
| TU23005 | 47 | Female | Clear cell renal cell carcinoma (ccRCC) | G2 | Yes | Frozen |
| TU23013 | 61 | Male | Clear cell renal cell carcinoma (ccRCC) | G2 | No | Frozen |
| TU23016 | 51 | Male | Clear cell renal cell carcinoma (ccRCC) | G3 | Yes | Frozen |
| TU23017 | 73 | Female | Clear cell renal cell carcinoma (ccRCC) | G4 | Yes | Fresh |
| TU23018 | 51 | Male | Clear cell renal cell carcinoma (ccRCC) | G2 | Yes | Frozen |
| TU23025 | 70 | Male | Clear cell renal cell carcinoma (ccRCC) | G3 | Yes | Frozen |
| TU23034 | 49 | Male | Clear cell renal cell carcinoma (ccRCC) | G3 | Yes | Frozen |
| TU23038 | 60 | Male | Clear cell renal cell carcinoma (ccRCC) | G3 | Yes | Frozen |
| TU23043 | 74 | Male | Clear cell renal cell carcinoma (ccRCC) | G4 | Yes | Frozen |
| TU24003 | 81 | Female | Clear cell renal cell carcinoma (ccRCC) | G3 | Yes | Frozen |
| TU24017 | 77 | Male | Clear cell renal cell carcinoma (ccRCC) | G2 | Yes | Fresh |
| TU24018 | 83 | Male | Oncocytoma | - | Yes | Fresh |
| TU25002 | 74 | Male | Clear cell renal cell carcinoma (ccRCC) | G2 | No | Fresh |
| TU25003 | 71 | Male | Clear cell renal cell carcinoma (ccRCC) | G3 | No | Fresh |

**Supplementary Table 4*.***Tissue and tubuloids STRs analysis

|  | D8S1179 | D21S11 | D7S820 | CSP1PO | D3S1358 | TH01 | D13S317 | D16S539 | D2S1338 | D19S433 | vWA | TPOX | D18S51 | AMEL | D5S818 | FGA |
| --- | --- | --- | --- | --- | --- | --- | --- | --- | --- | --- | --- | --- | --- | --- | --- | --- |
| Tissue 1 | 12, 15 | 30 | 8, 12 | 11, 13 | 16, 18 | 6, 9.3 | 11 | 9, 12 | 19, 20 | 12, 14 | 15, 17 | 8, 9 | 13, 21 | X, X | 12 | 21, 24 |
| Tubuloid1 | 12, 15 | 30 | 8, 12 | 11, 13 | 16, 18 | 6, 9.3 | 11 | 9, 12 | 19, 20 | 12, 14 | 15, 17 | 8, 9 | 13, 21 | X, X | 12 | 21, 24 |
| Tissue 2 | 13, 14 | 29, 30 | 9, 12 | 10, 11 | 15 | 9.3 | 8, 12 | 10, 13 | 19, 24 | 13, 14 | 15, 16 | 8, 10 | 13, 15 | X, Y | 11, 12 | 19 |
| Tubuloid 2 | 13, 14 | 29, 30 | 9, 12 | 10, 11 | 15 | 9.3 | 8, 12 | 10, 13 | 19, 24 | 13, 14 | 15, 16 | 8, 10 | 13, 15 | X, Y | 11, 12 | 19 |
| Tissue 3 | 12, 15 | 29, 30.2 | 8, 9 | 11, 12 | 17, 18 | 8 | 11 | 12, 13 | 20, 24 | 14, 16 | 16, 19 | 8, 11 | 12, 17 | X, X | 12, 13 | 22, 24 |
| Tubuloid 3 (Fresh) | 12, 15 | 29, 30.2 | 8, 9 | 11, 12 | 17, 18 | 8 | 11 | 12, 13 | 20, 24 | 14, 16 | 16, 19 | 8, 11 | 12, 17 | X, X | 12, 13 | 22, 24 |
| Tubuloid 3 (Frozen) | 12, 15 | 29, 30.2 | 8, 9 | 11, 12 | 17, 18 | 8 | 11 | 12, 13 | 20, 24 | 14, 16 | 16, 19 | 8, 11 | 12, 17 | X, X | 12, 13 | 22, 24 |
| Tissue 4 | 13, 14 | 28, 32.2 | 8, 12 | 10 | 15,17 | 6, 9 | 10, 11 | 12, 13 | 17, 24 | 14, 15 | 14, 17 | 12 | 14 | X, Y | 11, 13 | 20, 21 |
| Tubuloid 4 | 13, 14 | 28, 32.2 | 8, 12 | 10 | 15,17 | 6, 9 | 10, 11 | 12, 13 | 17, 24 | 14, 15 | 14, 17 | 12 | 14 | X, Y | 11, 13 | 20, 21 |
| Tissue 5 | 13, 15 | 29 | 8, 12 | 11, 13 | 15, 16 | 9.3 | 11 | 9, 11 | 23, 24 | 14, 15 | 17, 18 | 8, 9 | 13, 14 | X, Y | 11, 13 | 22, 25 |
| Tubuloid 5 | 13, 15 | 29 | 8, 12 | 11, 13 | 15, 16 | 9.3 | 11 | 9, 11 | 23, 24 | 14, 15 | 17, 18 | 8, 9 | 13, 14 | X, Y | 11, 13 | 22, 25 |
| Tissue 6 | 10, 14 | 30 | 8, 13 | 11, 13 | 16, 18 | 6, 9 | 11, 14 | 10, 11 | 19, 25 | 16, 16.2 | 14, 18 | 9, 11 | 14, 15 | X, Y | 11, 13 | 20, 22 |
| Tubuloid 6 | 10, 14 | 30 | 8, 13 | 11, 13 | 16, 18 | 6, 9 | 11, 14 | 10, 11 | 19, 25 | 16, 16.2 | 14, 18 | 9, 11 | 14, 15 | X, Y | 11, 13 | 20, 22 |
| Tissue 7 | 13 | 31.2 | 10, 12 | 12, 13 | 16 | 7 | 11, 13 | 12, 13 | 19 | 13, 14 | 14, 16 | 8, 9 | 15, 17 | X, Y | 12 | 20, 21 |
| Tubuloid 7 | 13 | 31.2 | 10, 12 | 12, 13 | 16 | 7 | 11, 13 | 12, 13 | 19 | 13, 14 | 14, 16 | 8, 9 | 15, 17 | X, Y | 12 | 20, 21 |
| Tissue 8 | 15 | 29, 32.2 | 9, 12 | 11, 12 | 14, 16 | 7, 8 | 12, 13 | 9, 11 | 24 | 13, 14 | 17, 19 | 8 | 14 | X, Y | 8, 11 | 21, 27 |
| Tubuloid 8 | 15 | 29, 32.2 | 9, 12 | 11, 12 | 14, 16 | 7, 8 | 12, 13 | 9, 11 | 24 | 13, 14 | 17, 19 | 8 | 14 | X, Y | 8, 11 | 21, 27 |
| Tissue 9 | 11, 16 | 29 | 9, 11 | 10, 11 | 15, 17 | 7, 9.3 | 10, 11 | 11, 12 | 16, 20 | 13, 15.2 | 15, 17 | 11, 12 | 14, 17 | X, Y | 12 | 19, 21 |
| Tubuloid 9 | 11, 16 | 29 | 9, 11 | 10, 11 | 15, 17 | 7, 9.3 | 10, 11 | 11, 12 | 16, 20 | 13, 15.2 | 15, 17 | 11, 12 | 14, 17 | X, Y | 12 | 19, 21 |
| Tissue 10 (Tumoral) | 12, 15 | 30 | 8, 12 | 11, 13 | 16, 18 | 6, 9.3 | 11 | 9, 12 | 19, 20 | 12, 14 | 15, 17 | 8, 9 | 13, 21 | X, X | 12 | 21, 24 |
| Tubuloid 10 (Tumoral) | 12, 15 | 30 | 8, 12 | 11, 13 | 16, 18 | 6, 9.3 | 11 | 9, 12 | 19, 20 | 12, 14 | 15, 17 | 8, 9 | 13, 21 | X, X | 12 | 21, 24 |
| Tissue 11 (Tumoral) | 13, 14 | 29, 30 | 9, 12 | 10, 11 | 15 | 9.3 | 8, 12 | 10, 13 | 19, 24 | 13, 14 | 15, 16 | 8, 10 | 13, 15 | X, Y | 11, 12 | 19 |
| Tubuloid 11 (Tumoral) | 13, 14 | 29, 30 | 9, 12 | 10, 11 | 15 | 9.3 | 8, 12 | 10, 13 | 19, 24 | 13, 14 | 15, 16 | 8, 10 | 13, 15 | X, Y | 11, 12 | 19 |
| Tissue 12 (Tumoral) | 13, 14 | 28, 32.2 | 8, 12 | 10 | 15,17 | 6 | 10, 11 | 12, 13 | 17, 24 | 14, 15 | 14 | 12 | 14 | X, Y | 11, 13 | 20, 21 |
| Tubuloid 12 (Tumoral) | 13, 14 | 28, 32.2 | 8, 12 | 10 | 15,17 | 6 | 10, 11 | 12, 13 | 17, 24 | 14, 15 | 14 | 12 | 14 | X, Y | 11, 13 | 20, 21 |

**
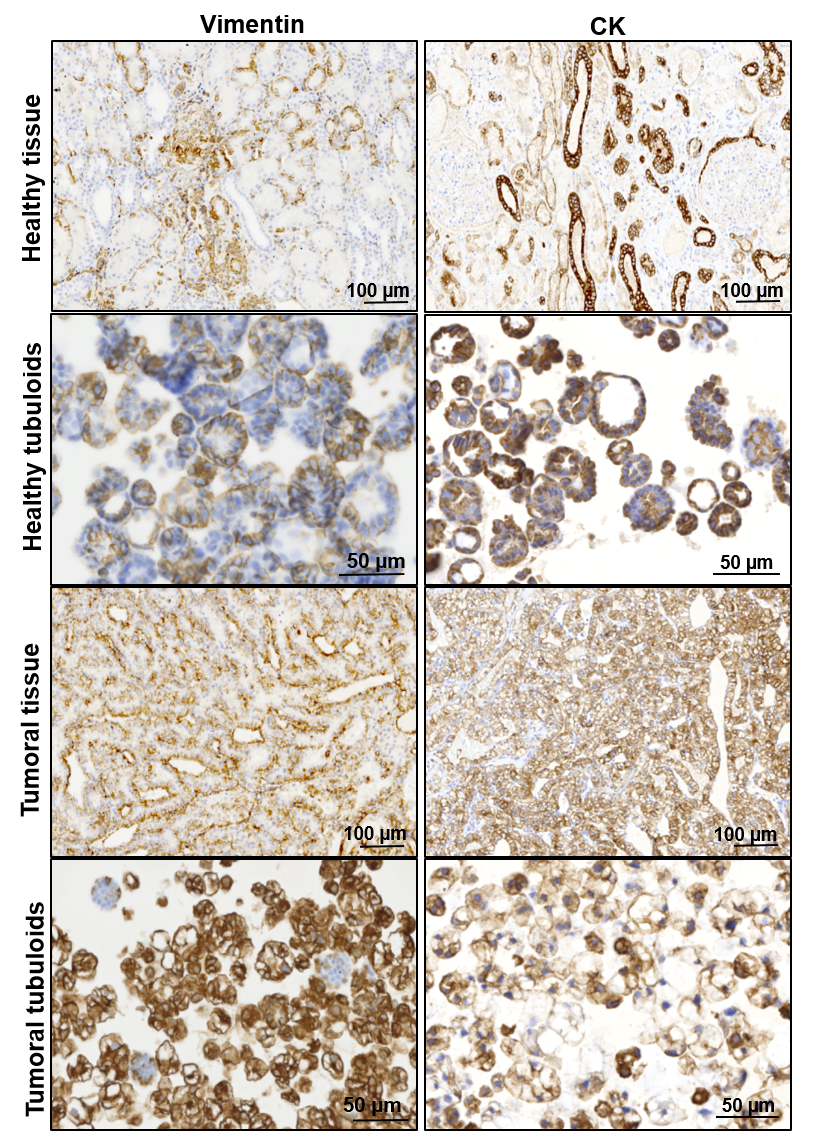
**

**Supplementary Figure 1**. **Immunohistochemical staining for vimentin and CK AE1/AE3.** The immunohistochemical staining was performed on both the original healthy and tumoral renal tissue and the corresponding tubuloid cultures. The images show positive expression of both markers in the tubuloids, comparable to that observed in their respective tissue of origin.

**
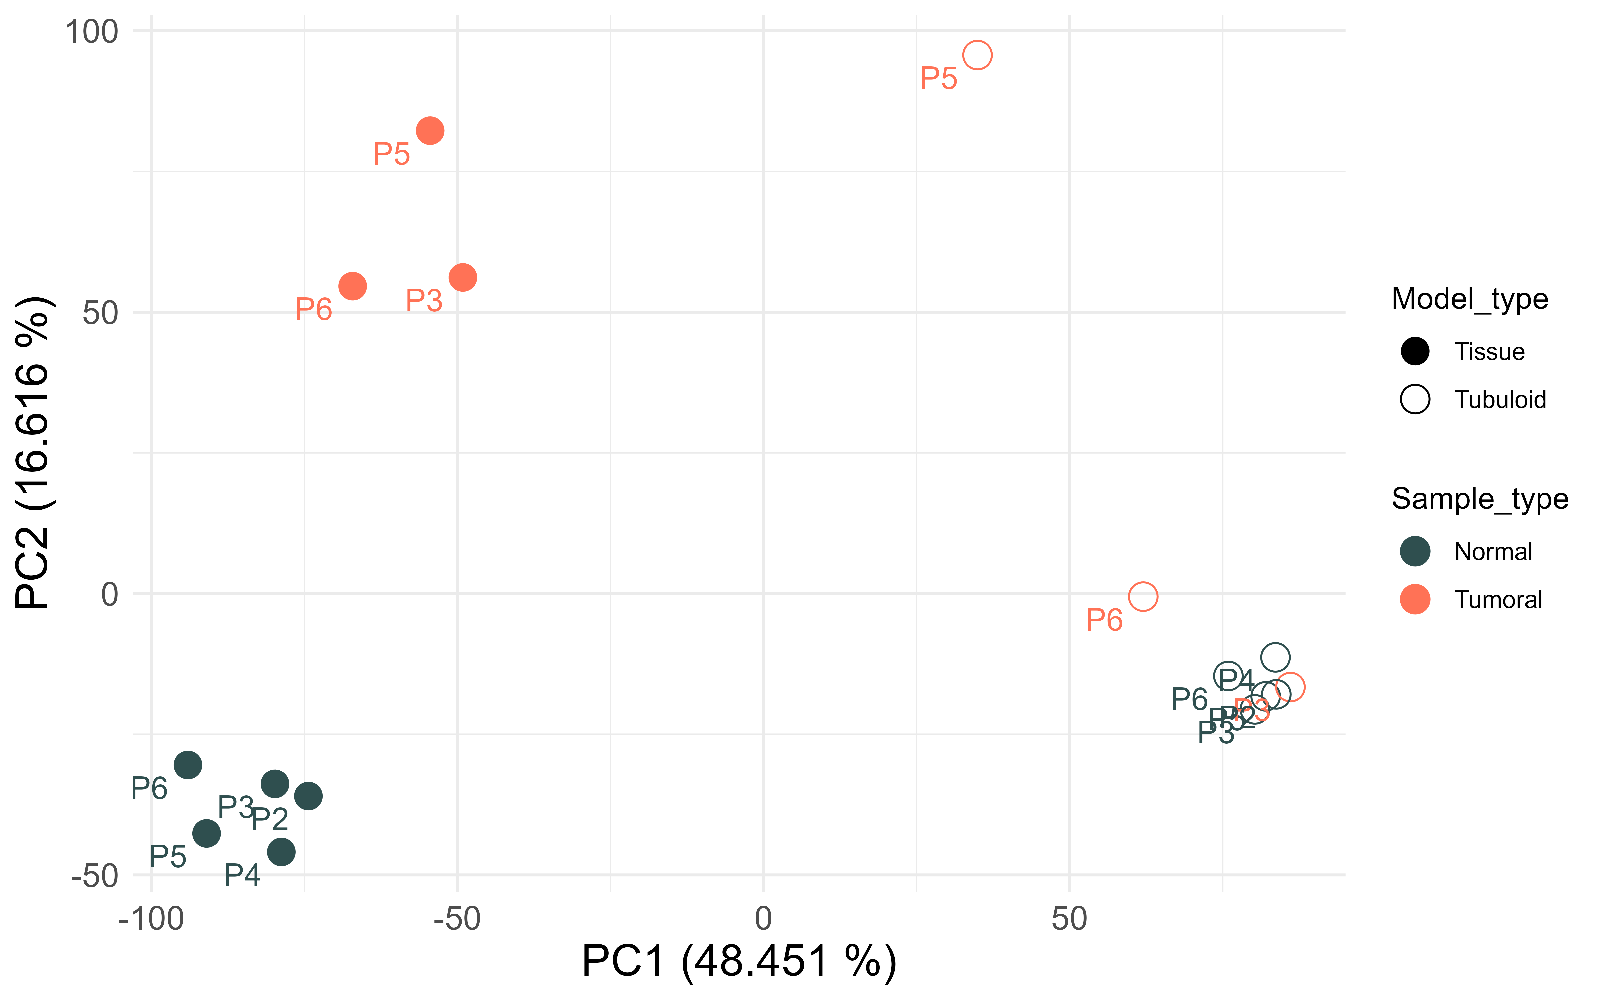
**

**Supplementary Figure 2**. Principal component analysis (PCA) of RNA expression in tubuloids and tissues of origin.

**
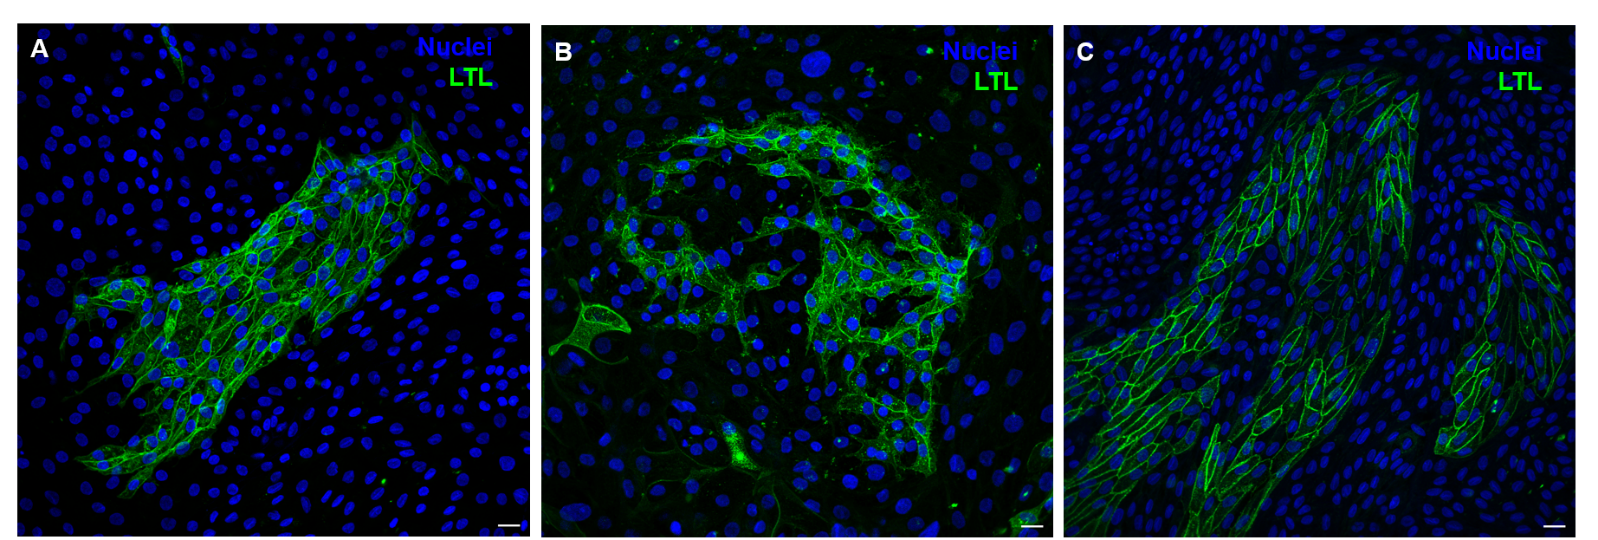
**

**Supplementary Figure 3.** LTL expression was observed across different serial passages derived from the same patient. Scale bar: 20 µm.
